# Supplementary material for: GO5.0: the joint NERC–Met Office NEMO global ocean model for use in coupled and forced applications
Source: Copernicus journal article supplement (doi:10.5194/gmd-7-1069-2014), 2014-06-06
Supplement: Supplementary file 1 [file gmd-7-1069-2014-supplement.pdf]

Supplement of Geosci. Model Dev., 7, 1069–1092, 2014  
<http://www.geosci-model-dev.net/gmd-7-1069-2014/>  
doi:10.5194/gmd-7-1069-2014-supplement  
© Author(s) 2014. CC Attribution 3.0 License.

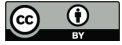

*Supplement of*

## **GO5.0: the joint NERC–Met Office NEMO global ocean model for use in coupled and forced applications**

**A. Megann et al.**

*Correspondence to:* A. Megann (apm@noc.ac.uk)



```

cn_ocerst_out = "restart"      ! suffix of ocean restart name (output)
/

!!=====
!!                      *** Domain namelists ***
!!=====
!!  namzgr      vertical coordinate
!!  namzgr_sco  s-coordinate or hybrid z-s-coordinate
!!  namdom      space and time domain (bathymetry, mesh, timestep)
!!=====
!-----
&namzgr          ! vertical coordinate

!-----
ln_zco          = .false.      ! z-coordinate - full steps (T/F)
("key_zco" may also be defined)
ln_zps         = .true.       ! z-coordinate - partial steps (T/F)
ln_sco         = .false.      ! s- or hybrid z-s-coordinate (T/F)
/

!-----
&namzgr_sco    ! s-coordinate or hybrid z-s-coordinate

!-----
rn_sbot_min    = 300.         ! minimum depth of s-bottom surface (>0) (m)
rn_sbot_max    = 5250.       ! maximum depth of s-bottom surface (= ocean depth)
(>0) (m)
rn_theta       = 6.0         ! surface control parameter (0<=theta<=20)
rn_thetb      = 0.75        ! bottom control parameter (0<=thetb<= 1)
rn_rmax        = 0.15       ! maximum cut-off r-value allowed (0<r_max<1)
ln_s_sigma     = .false.    ! hybrid s-sigma coordinates
rn_bb          = 0.8         ! stretching with s-sigma
rn_hc          = 150.0      ! critical depth with s-sigma
/

!-----
&namdom        ! space and time domain (bathymetry, mesh, timestep)

!-----
nn_bathy       = 1          ! compute (=0) or read(=1) the bathymetry file
nn_closea      = 0          ! closed seas and lakes are removed (=0) or kept (=1)
from the ORCA domain
nn_msh         = 0          ! create (=1) a mesh file (coordinates, scale factors,
masks) or not (=0)
rn_hmin        = -8.        ! min depth of the ocean (>0) or min number of ocean
level (<0)
rn_e3zps_min   = 25.        ! the thickness of the partial step is set larger than
the minimum
rn_e3zps_rat   = 0.2        ! of e3zps_min and e3zps_rat * e3t (N.B.
0<e3zps_rat<1)
!

rn_rdt         = 1350.      ! time step for the dynamics (and tracer if nacc=0)
==> 5760

```

```

nn_baro      = 16      ! number of barotropic time step (for the split
explicit algorithm) ("key_dynspg_ts")
rn_atfp      = 0.1     ! asselin time filter parameter
nn_acc       = 0       ! acceleration of convergence : =1      used, rdt <
rdttra(k)
!
!                               =0, not used, rdt = rdttra
rn_rdtmin    = 1440.   ! minimum time step on tracers (used if nacc=1)
rn_rdtmax    = 1440.   ! maximum time step on tracers (used if nacc=1)
rn_rdth      = 800.    ! depth variation of tracer time step (used if nacc=1)
/

!-----
&namtsd      ! data : Temperature & Salinity

!-----
!
! file name ! frequency (hours) ! variable ! time interp. ! clim
!'yearly' or ! weights ! rotation !
!
! (if <0 months) ! name ! (logical) ! (T/F)
! 'monthly' ! filename ! pairing !
sn_tem = 'data_lm_potential_temperature_nomask', -1, 'votemper', .true. ,
.true., 'yearly' , ' ' , ' ' !
sn_sal = 'data_lm_salinity_nomask' , -1, 'vosaline', .true. ,
.true., 'yearly' , ' ' , ' ' !
!

cn_dir       = './'     ! root directory for the location of the runoff files
ln_tsd_init  = .true.   ! Initialisation of ocean T & S with T & S input data
(T) or not (F)
ln_tsd_tradmp = .true. ! damping of ocean T & S toward T & S input data (T)
or not (F)
/

!!=====
!!          *** Surface Boundary Condition namelists ***
!!=====
!!  namsbc      surface boundary condition
!!  namsbc_ana  analytical          formulation
!!  namsbc_flx  flux                formulation
!!  namsbc_clio CLIO bulk formulae formulation
!!  namsbc_core CORE bulk formulae formulation
!!  namsbc_cpl  CouPLed            formulation
("key_coupled")
!!  namtra_qsr  penetrative solar radiation
!!  namsbc_rnf  river runoffs
!!  namsbc_ssr  sea surface restoring term (for T and/or S)
!!  namsbc_alb  albedo parameters
!!=====
!-----
&namsbc      ! Surface Boundary Condition (surface module)

!-----
nn_fsbc      = 1       ! frequency of surface boundary condition computation
!
! (= the frequency of sea-ice model call)
ln_ana       = .false. ! analytical formulation (T => fill namsbc_ana )
ln_flx       = .false. ! flux formulation (T => fill namsbc_flx )

```

```

ln_blk_clio = .false.      ! CLIO bulk formulation (T => fill namsbc_clio)
ln_blk_core = .true.      ! CORE bulk formulation (T => fill namsbc_core)
ln_blk_mfs = .false.      ! MFS bulk formulation (T =>
fill namsbc_mfs )
ln_cpl      = .false.      ! Coupled formulation (T => fill namsbc_cpl )
ln_apr_dyn  = .false.      ! Patm gradient added in ocean & ice Eqs. (T =>
fill namsbc_apr )
nn_ice      = 4           ! =0 no ice boundary condition ,
! =1 use observed ice-cover ,
! =2 ice-model used ("key_lim3" or "key_lim2")
ln_dm2dc    = .false.      ! daily mean to diurnal cycle short wave (qsr)
ln_rnf      = .true.      ! runoffs (T => fill namsbc_rnf)
ln_ssr      = .true.      ! Sea Surface Restoring on T and/or S (T => fill
namsbc_ssr)
nn_fwb      = 0           ! FreshWater Budget: =0 unchecked
! =1 global mean of e-p-r set to zero at each time step
! =2 annual global mean of e-p-r set to zero
! =3 global emp set to zero and spread out over erp
area
ln_cdgw     = .false.      ! Neutral drag coefficient read from wave model (T =>
fill namsbc_wave)
/

```

```

!-----
&namsbc_ana ! analytical surface boundary condition

```

```

!-----
nn_tau000   = 0           ! gently increase the stress over the first ntau_rst
time-steps
rn_utau0    = 0.5         ! uniform value for the i-stress
rn_vtau0    = 0.e0        ! uniform value for the j-stress
rn_qns0     = 0.e0        ! uniform value for the total heat flux
rn_qsr0     = 0.e0        ! uniform value for the solar radiation
rn_emp0     = 0.e0        ! uniform value for the freswater budget (E-P)
/

```

```

!-----
&namsbc_flx ! surface boundary condition : flux formulation

```

```

!-----
! ! file name ! frequency (hours) ! variable ! time interpol.
! clim ! 'yearly' / ! weights ! rotation !
! ! ! ! (if <0 months) ! name ! (logical)
! (T/F) ! 'monthly' ! filename ! pairing !
sn_utau    = 'utau'      ,      24      , 'utau' , .false. ,
.false. , 'yearly' , '' , '' !
sn_vtau    = 'vtau'      ,      24      , 'vtau' , .false. ,
.false. , 'yearly' , '' , '' !
sn_qtot    = 'qtot'      ,      24      , 'qtot' , .false. ,
.false. , 'yearly' , '' , '' !
sn_qsr     = 'qsr'       ,      24      , 'qsr' , .false. ,
.false. , 'yearly' , '' , '' !
sn_emp     = 'emp'       ,      24      , 'emp' , .false. ,
.false. , 'yearly' , '' , '' !
!

```

```
cn_dir      = './'      ! root directory for the location of the flux files
/
```

```
!-----  
&namsbc_clio ! namsbc_clio CLIO bulk formulae
```

```
!-----  
!           ! file name ! frequency (hours) ! variable ! time interpol.  
! clim     ! 'yearly' / ! weights ! rotation !  
!           !           ! (if <0 months) ! name      ! (logical)  
! (T/F)    ! 'monthly' ! filename ! pairing !  
sn_utau    = 'taux_lm' , -1 , 'sozotaux' , .true. ,  
.true. , 'yearly' , '' , '' !  
sn_vtau    = 'tauy_lm' , -1 , 'sometauy' , .true. ,  
.true. , 'yearly' , '' , '' !  
sn_wndm    = 'flx' , -1 , 'socliowi' , .true. ,  
.true. , 'yearly' , '' , '' !  
sn_tair    = 'flx' , -1 , 'socliot2' , .true. ,  
.true. , 'yearly' , '' , '' !  
sn_humi    = 'flx' , -1 , 'socliohu' , .true. ,  
.true. , 'yearly' , '' , '' !  
sn_ccov    = 'flx' , -1 , 'socliocl' , .false. ,  
.true. , 'yearly' , '' , '' !  
sn_prec    = 'flx' , -1 , 'socliopl' , .false. ,  
.true. , 'yearly' , '' , '' !  
!  
cn_dir     = './'      ! root directory for the location of the bulk files are  
/
```

```
!-----  
&namsbc_core ! namsbc_core CORE bulk formulae
```

```
!-----  
!           ! file name ! frequency (hours) ! variable ! time interpol.  
! clim     ! 'yearly' / ! weights ! rotation !  
!           !           ! (if <0 months) ! name      ! (logical)  
! (T/F)    ! 'monthly' ! filename ! pairing !  
sn_wndi    = 'u10_core' , 6 , 'U_10_MOD' , .true. ,  
.false. , 'yearly' , 'weights_grid03_bicubic_orca025.nc' , 'Ume' !  
sn_wndj    = 'v10_core' , 6 , 'V_10_MOD' , .true. ,  
.false. , 'yearly' , 'weights_grid03_bicubic_orca025.nc' , 'Vme' !  
sn_qsr     = 'qsw_core' , 24 , 'SWDN_MOD' , .false. ,  
.false. , 'yearly' , 'weights_grid03_bilinear_orca025.nc' , '' !  
sn_qlw     = 'qlw_core' , 24 , 'LWDN_MOD' , .false. ,  
.false. , 'yearly' , 'weights_grid03_bilinear_orca025.nc' , '' !  
sn_tair    = 't10_core' , 6 , 'T_10_MOD' , .true. ,  
.false. , 'yearly' , 'weights_grid03_bilinear_orca025.nc' , '' !  
sn_humi    = 'q10_core' , 6 , 'Q_10_MOD' , .true. ,  
.false. , 'yearly' , 'weights_grid03_bilinear_orca025.nc' , '' !  
sn_prec    = 'precip_core' , -1 , 'TPRECIP' , .true. ,  
.false. , 'yearly' , 'weights_grid03_bilinear_orca025.nc' , '' !  
sn_snow    = 'snow_core' , -1 , 'SNOW' , .true. ,  
.false. , 'yearly' , 'weights_grid03_bilinear_orca025.nc' , '' !  
sn_tdif    = 'taudif_core' , 24 , 'taudif' , .true. ,  
.false. , 'yearly' , 'weights_grid03_bilinear_orca025.nc' , '' !
```

```

!
cn_dir      = './'      ! root directory for the location of the bulk files
ln_2m      = .false.   ! air temperature and humidity referenced at 2m (T)
instead 10m (F)
ln_taudif  = .false.   ! HF tau contribution: use "mean of stress module -
module of the mean stress" data ?
rn_pfac    = 1.        ! multiplicative factor for precipitation (total & snow)
/

```

```

!-----
&namsbc_mfs ! namsbc_mfs MFS bulk formulae

```

```

!-----
!
!           ! file name ! frequency (hours) ! variable ! time interp. !
clim ! 'yearly' ! weights ! rotation !
!           !           ! (if <0 months) ! name ! (logical) !
(T/F) ! 'monthly' ! filename ! pairing !
sn_wndi   = 'ecmwf' , 6 , 'u10' , .true. ,
.false. , 'daily' , 'bicubic.nc' , '' ! , 'v10' , .true. ,
sn_wndj   = 'ecmwf' , 6 , 'v10' , .true. ,
.false. , 'daily' , 'bicubic.nc' , '' ! , 'clc' , .true. ,
sn_clc    = 'ecmwf' , 6 , 'clc' , .true. ,
.false. , 'daily' , 'bilinear.nc' , '' ! , 'msl' , .true. ,
sn_msl    = 'ecmwf' , 6 , 'msl' , .true. ,
.false. , 'daily' , 'bicubic.nc' , '' ! , 't2' , .true. ,
sn_tair   = 'ecmwf' , 6 , 't2' , .true. ,
.false. , 'daily' , 'bicubic.nc' , '' ! , 'rh' , .true. ,
sn_rhm    = 'ecmwf' , 6 , 'rh' , .true. ,
.false. , 'daily' , 'bilinear.nc' , '' ! , 'precip' , .true. ,
sn_prec   = 'ecmwf' , 6 , 'precip' , .true. ,
.true. , 'daily' , 'bicubic.nc' , '' !
cn_dir    = './ECMWF/' ! root directory for the location of the bulk
files
/

```

```

!-----
&namsbc_cpl ! coupled ocean/atmosphere model
("key_coupled")

```

```

!-----
!
!           ! description ! multiple ! vector !
vector      ! vector !
!           !           ! categories ! reference !
orientation ! grids !
! send
sn_snd_temp = 'weighted oce and ice' , 'no' , '' ,
'' !
sn_snd_alb  = 'weighted ice' , 'no' , '' ,
'' !
sn_snd_thick = 'none' , 'no' , '' ,
'' !
sn_snd_crt  = 'none' , 'no' , 'spherical' ,
'eastward-northward' , 'T' !
sn_snd_co2  = 'coupled' , 'no' , '' ,
'' !

```

```

! receive
sn_rcv_wl0m = 'none' , 'no' , '' ,
'' , '' !
sn_rcv_taumod = 'coupled' , 'no' , '' ,
'' , '' !
sn_rcv_tau = 'oce only' , 'no' , 'cartesian' ,
'eastward-northward', 'U,V' !
sn_rcv_dqnsdt = 'coupled' , 'no' , '' ,
'' , '' !
sn_rcv_qsr = 'oce and ice' , 'no' , '' ,
'' , '' !
sn_rcv_qns = 'oce and ice' , 'no' , '' ,
'' , '' !
sn_rcv_emp = 'conservative' , 'no' , '' ,
'' , '' !
sn_rcv_rnf = 'coupled' , 'no' , '' ,
'' , '' !
sn_rcv_cal = 'coupled' , 'no' , '' ,
'' , '' !
sn_rcv_co2 = 'coupled' , 'no' , '' ,
'' , '' !
/

```

```

-----
&namtra_qsr ! penetrative solar radiation

```

```

!-----
! ! file name ! frequency (hours) ! variable ! time interpol.
! clim ! 'yearly' / ! weights ! rotation !
! ! ! (if <0 months) ! name ! (logical)
! (T/F) ! 'monthly' ! filename ! pairing !
sn_chl = 'chlorophyll', -1 , 'CHLA' , .true. ,
.true. , 'yearly' , '' , '' !
cn_dir = './' ! root directory for the location of the runoff files
ln_traqsr = .true. ! Light penetration (T) or not (F)
ln_qsr_rgb = .true. ! RGB (Red-Green-Blue) light penetration
ln_qsr_2bd = .false. ! 2 bands light penetration
ln_qsr_bio = .false. ! bio-model light penetration
nn_chldta = 0 ! RGB : Chl data (=1) or cst value (=0)
rn_abs = 0.58 ! RGB & 2 bands: fraction of light (rn_sil)
rn_si0 = 0.35 ! RGB & 2 bands: shortess depth of extinction
rn_sil = 23.0 ! 2 bands: longest depth of extinction
/

```

```

-----
&namsbc_rnf ! runoffs namelist surface boundary condition

```

```

!-----
! ! file name ! frequency (hours) ! variable ! time interpol.
! clim ! 'yearly' / ! weights ! rotation !
! ! ! (if <0 months) ! name ! (logical)
! (T/F) ! 'monthly' ! filename ! pairing !
sn_rnf = 'runoff_lm_nomask' , -1 , 'sorunoff' , .true. ,
.true. , 'yearly' , '' , '' !

```



```

sn_cnf      = 'runoff_lm_nomask' , 0 , 'socoefr' , .false. ,
.true. , 'yearly' , '' , '' !
sn_s_rnf    = 'runoffs' , 24 , 'rosaline' , .true.
, .true. , 'yearly' , '' , '' !
sn_t_rnf    = 'runoffs' , 24 , 'rotemper' , .true.
, .true. , 'yearly' , '' , '' !
sn_dep_rnf  = 'runoffs' , 0 , 'rodepth' , .false.
, .true. , 'yearly' , '' , '' !
cn_dir      = './' ! root directory for the location of the runoff files
ln_rnf_emp  = .false. ! runoffs included into precipitation field (T) or
into a file (F)
ln_rnf_mouth = .true. ! specific treatment at rivers mouths
rn_hrnf     = 10.e0 ! depth over which enhanced vertical mixing is used
rn_avt_rnf  = 2.e-3 ! value of the additional vertical mixing coef.
[m2/s]
rn_rfact    = 1.e0 ! multiplicative factor for runoff
ln_rnf_depth = .false. ! read in depth information for runoff
ln_rnf_tem   = .false. ! read in temperature information for runoff
ln_rnf_sal   = .false. ! read in salinity information for runoff
/

```

```

!-----
&namsbc_apr ! Atmospheric pressure used as ocean forcing or in bulk

```

```

!-----
! ! file name ! frequency (hours) ! variable ! time interpol. !
clim ! 'yearly' / ! weights ! rotation !
! ! ! (if <0 months) ! name ! (logical) !
(T/F) ! 'monthly' ! filename ! pairing !
sn_apr = 'patm' , -1 , 'soms1pre' , .true. , .true.
, 'yearly' , '' , '' !
cn_dir = './' ! root directory for the location of the bulk files
ln_ref_apr = .false. ! ref. pressure: global mean Patm (T) or a constant
(F)
/

```

```

!-----
&namsbc_ssr ! surface boundary condition : sea surface restoring

```

```

!-----
! ! file name ! frequency (hours) ! variable ! time interpol.
! clim ! 'yearly' / ! weights ! rotation !
! ! ! (if <0 months) ! name ! (logical)
! (T/F) ! 'monthly' ! filename ! pairing !
sn_sst = 'sst_lm.nc' , -1 , 'sst' , .false. ,
.false. , 'yearly' , '' , '' !
sn_sss = 'sss_lm.nc' , -1 , 'vosaline' , .true. ,
.true. , 'yearly' , '' , '' !
cn_dir = './' ! root directory for the location of the runoff files
nn_sstr = 0 ! add a retroaction term in the surface heat flux
(=1) or not (=0)
nn_sssr = 2 ! add a damping term in the surface freshwater flux
(=2)
! or to SSS only (=1) or no damping term (=0)

```

```

rn_dqdt      =  -40.      ! magnitude of the retroaction on temperature
[W/m2/K]
rn_deds      =  -33.333333 ! magnitude of the damping on salinity
[mm/day/psu]
ln_sssr_bnd  =  .true.    ! flag to bound erp term (associated with nn_sssr=2)
rn_sssr_bnd  =  4.e0      ! ABS(Max/Min) value of the damping erp term [mm/day]
/

!-----
&namcbc_alb  !   albedo parameters

!-----
rn_cloud     =   0.06     ! cloud correction to snow and ice albedo
rn_albice    =   0.5      ! albedo of melting ice in the arctic and antarctic
rn_alphd     =   0.80     ! coefficients for linear interpolation used to
rn_alphc     =   0.65     ! compute albedo between two extremes values
rn_alphdi    =   0.72     ! (Payne, 1972)
/

!!=====
!!                *** Lateral boundary condition ***
!!=====
!!  namlbc        lateral momentum boundary condition
!!  namcla        cross land advection
!!  namobc        open boundaries parameters
("key_obc")
!!  namagrif      agrif nested grid ( read by child model only )
("key_agrif")
!!  nambdy        Unstructured open boundaries
("key_bdy")
!!  namtide       Tidal forcing at open boundaries
("key_bdy_tides")
!!=====
!-----
&namlbc      !   lateral momentum boundary condition

!-----
rn_shlat     =   0.       ! shlat = 0
                        ! free slip ! partial slip ! no slip !
strong slip

ln_vorlat    = .false.    ! consistency of vorticity boundary condition with
analytical eqs.
/

!-----
&namcla      !   cross land advection

!-----
nn_cla       =   0       ! advection between 2 ocean pts separates by land
/

!-----
&namobc      !   open boundaries parameters
("key_obc")

```

```

!-----
ln_obc_clim= .true.      ! climatological obc data files (T) or not (F)
ln_vol_cst  = .false.    ! impose the total volume conservation (T) or not (F)
ln_obc_flu  = .false.    ! Flather open boundary condition
nn_obcdta  = 0           ! = 0 the obc data are equal to the initial state
                ! = 1 the obc data are read in 'obc.dta' files
cn_obcdta  = 'annual'    ! set to annual if obc datafile hold 1 year of data
                ! set to monthly if obc datafile hold 1 month of
data

rn_dpein   = 1.         ! damping time scale for inflow at east open boundary
rn_dpwin   = 1.         ! - - - west - -
rn_dpnin   = 1.         ! - - - north - -
rn_dpsin   = 1.         ! - - - south - -
rn_dpeob   = 1500.      ! time relaxation (days) for the east open boundary
rn_dpwob   = 15.        ! - - - west - -
rn_dpnob   = 1500.      ! - - - north - -
rn_dpsob   = 15.        ! - - - south - -
rn_volemp  = 1.         ! = 0 the total volume change with the surface flux (E-P-
                ! = 1 the total volume remains constant
/

!-----
&namagrif      ! AGRIF zoom
("key_agrif")

!-----
nn_cln_update = 3       ! baroclinic update frequency
ln_spc_dyn    = .true.   ! use 0 as special value for dynamics
rn_sponge_tra = 2880.    ! coefficient for tracer sponge layer [m2/s]
rn_sponge_dyn = 2880.    ! coefficient for dynamics sponge layer [m2/s]
/

!-----
&nam_tide      ! tide parameters (#ifdef key_tide)

!-----
ln_tide_pot   = .true.   ! use tidal potential forcing
nb_harmo      = 11       ! number of constituents used
cname(1)      = 'M2'     ! name of constituent
cname(2)      = 'S2'     !
cname(3)      = 'N2'     !
cname(4)      = 'K1'     !
cname(5)      = 'O1'     !
cname(6)      = 'Q1'     !
cname(7)      = 'M4'     !
cname(8)      = 'K2'     !
cname(9)      = 'P1'     !
cname(10)     = 'Mf'     !
cname(11)     = 'Mm'     !
/

!-----

```

```

&nambdy      ! unstructured open boundaries
("key_bdy")

!-----
nb_bdy = 1      ! number of open boundary sets
ln_coords_file = .true.      ! =T : read bdy coordinates from file
cn_coords_file = 'coordinates.bdy.nc'      ! bdy coordinates files
ln_mask_file = .false.      ! =T : read mask from file
cn_mask_file = ''      ! name of mask file (if ln_mask_file=.TRUE.)
nn_dyn2d      = 2      ! boundary conditions for barotropic fields
nn_dyn2d_dta  = 3      ! = 0, bdy data are equal to the initial state
      ! = 1, bdy data are read in 'bdydata .nc' files
      ! = 2, use tidal harmonic forcing data from files
      ! = 3, use external data AND tidal harmonic forcing
nn_dyn3d      = 0      ! boundary conditions for baroclinic velocities
nn_dyn3d_dta  = 0      ! = 0, bdy data are equal to the initial state
      ! = 1, bdy data are read in 'bdydata .nc' files
nn_tra      = 1      ! boundary conditions for T and S
nn_tra_dta   = 1      ! = 0, bdy data are equal to the initial state
      ! = 1, bdy data are read in 'bdydata .nc' files
nn_rimwidth  = 10      ! width of the relaxation zone
ln_vol      = .false.      ! total volume correction (see nn_volctl parameter)
nn_volctl   = 1      ! = 0, the total water flux across open boundaries is zero
/

```

```

!-----
&nambdy_dta      ! open boundaries - external data      ("key_bdy")

```

```

!-----
!      ! file name      ! frequency (hours) ! variable ! time
interpol. ! clim      ! 'yearly' / ! weights ! rotation !
!      !      ! (if <0 months) ! name      ! (logical)
! (T/F) ! 'monthly' ! filename ! pairing !
bn_ssh =      'amm12_bdyT_u2d' ,      24      , 'sossheig' ,      .true.
, .false. , 'daily' ,      ''      ,      ''      !
bn_u2d =      'amm12_bdyU_u2d' ,      24      , 'vobtcrtx' ,      .true.
, .false. , 'daily' ,      ''      ,      ''      !
bn_v2d =      'amm12_bdyV_u2d' ,      24      , 'vobtcrtx' ,      .true.
, .false. , 'daily' ,      ''      ,      ''      !
bn_u3d =      'amm12_bdyU_u3d' ,      24      , 'vozocrtx' ,      .true.
, .false. , 'daily' ,      ''      ,      ''      !
bn_v3d =      'amm12_bdyV_u3d' ,      24      , 'vomecrtx' ,      .true.
, .false. , 'daily' ,      ''      ,      ''      !
bn_tem =      'amm12_bdyT_tra' ,      24      , 'votemper' ,      .true.
, .false. , 'daily' ,      ''      ,      ''      !
bn_sal =      'amm12_bdyT_tra' ,      24      , 'vosaline' ,      .true.
, .false. , 'daily' ,      ''      ,      ''      !
cn_dir =      'bdydta/'      !
ln_full_vel = .false.      !
/

```

```

!-----
&nambdy_tide      ! tidal forcing at open boundaries

```

```

!-----

```

```

filtide      = 'bdydt/amm12_bdytide_'      ! file name root of tidal forcing
files
tide_cpt(1)  = 'Q1'      ! names of tidal components used
tide_cpt(2)  = 'O1'      ! names of tidal components used
tide_cpt(3)  = 'P1'      ! names of tidal components used
tide_cpt(4)  = 'S1'      ! names of tidal components used
tide_cpt(5)  = 'K1'      ! names of tidal components used
tide_cpt(6)  = '2N2'     ! names of tidal components used
tide_cpt(7)  = 'MU2'     ! names of tidal components used
tide_cpt(8)  = 'N2'      ! names of tidal components used
tide_cpt(9)  = 'NU2'     ! names of tidal components used
tide_cpt(10) = 'M2'      ! names of tidal components used
tide_cpt(11) = 'L2'      ! names of tidal components used
tide_cpt(12) = 'T2'      ! names of tidal components used
tide_cpt(13) = 'S2'      ! names of tidal components used
tide_cpt(14) = 'K2'      ! names of tidal components used
tide_cpt(15) = 'M4'      ! names of tidal components used
tide_speed(1) = 13.398661 ! phase speeds of tidal components (deg/hour)
tide_speed(2) = 13.943036 ! phase speeds of tidal components (deg/hour)
tide_speed(3) = 14.958932 ! phase speeds of tidal components (deg/hour)
tide_speed(4) = 15.000001 ! phase speeds of tidal components (deg/hour)
tide_speed(5) = 15.041069 ! phase speeds of tidal components (deg/hour)
tide_speed(6) = 27.895355 ! phase speeds of tidal components (deg/hour)
tide_speed(7) = 27.968210 ! phase speeds of tidal components (deg/hour)
tide_speed(8) = 28.439730 ! phase speeds of tidal components (deg/hour)
tide_speed(9) = 28.512585 ! phase speeds of tidal components (deg/hour)
tide_speed(10) = 28.984106 ! phase speeds of tidal components (deg/hour)
tide_speed(11) = 29.528479 ! phase speeds of tidal components (deg/hour)
tide_speed(12) = 29.958935 ! phase speeds of tidal components (deg/hour)
tide_speed(13) = 30.000002 ! phase speeds of tidal components (deg/hour)
tide_speed(14) = 30.082138 ! phase speeds of tidal components (deg/hour)
tide_speed(15) = 57.968212 ! phase speeds of tidal components (deg/hour)
ln_tide_date = .true.    ! adjust tidal harmonics for start date of run
/

!!=====
!!          *** Bottom boundary condition ***
!!=====
!!  namfbr      bottom friction
!!  nambbc      bottom temperature boundary condition
("key_trabbc")
!!  namtbl      bottom boundary layer scheme
("key_trabtbl_dif", "key_trabtbl_adv")
!!=====
!-----
&namfbr      ! bottom friction

!-----
nn_bfr      = 2      ! type of bottom friction : = 0 : no slip, = 2 :
nonlinear friction
!
!          = 3 : free slip, = 1 : linear friction
rn_bfri1    = 4.e-4  ! bottom drag coefficient (linear case)
rn_bfri2    = 1.e-3  ! bottom drag coefficient (non linear case)
rn_bfeb2    = 2.5e-3 ! bottom turbulent kinetic energy background
(m^2/s^2)

```

```

ln_bfr2d   = .true.      ! horizontal variation of the bottom friction coef
(read a 2D file )
ln_bfrimp  = .false.    !
rn_bfrien  = 50.        ! multiplying factor of bfr
/

!-----
&nambbc    ! bottom temperature boundary condition

!-----
ln_trabbc  = .true.      ! Apply a geothermal heating at the ocean bottom
nn_geoflx  = 2          ! geothermal heat flux: = 0 no flux
            ! = 1 constant flux
            ! = 2 variable flux (read in geothermal_heating.nc in mW/m2)
rn_geoflx_cst = 0.e-3    ! Constant value of geothermal heat flux [W/m2]
/

!-----
&namdbl    ! bottom boundary layer scheme

!-----
nn_bbl_ldf = 1          ! diffusive bbl (=1) or not (=0)
nn_bbl_adv = 1          ! advective bbl (=1/2) or not (=0)
rn_ahtbbl  = 1000.      ! lateral mixing coefficient in the bbl [m2/s]
rn_gambbl  = 10.        ! advective bbl coefficient [s]
/

!!=====
!!                      Tracer ( T & S ) namelists
!!=====
!!  nameos      equation of state
!!  namtra_adv  advection scheme
!!  namtra_ldf  lateral diffusion scheme
!!  namtra_dmp  T & S newtonian damping
("key_tradmp")
!!=====
!-----
&nameos      ! ocean physical parameters

!-----
nn_eos       = 0        ! type of equation of state and Brunt-Vaisala frequency
            ! = 0, UNESCO (formulation of Jackett and McDougall (1994) and of
McDougall (1987) )
            ! = 1, linear: rho(T) = rau0 * ( 1.028 - ralpha * T )
            ! = 2, linear: rho(T,S) = rau0 * ( rbeta * S - ralpha * T )
rn_alpha     = 2.e-4    ! thermal expansion coefficient (neos= 1 or 2)
rn_beta      = 0.001    ! saline expansion coefficient (neos= 2)
/

!-----
&namtra_adv  ! advection scheme for tracer

!-----
ln_traadv_cen2 = .false. ! 2nd order centered scheme
ln_traadv_tvd  = .true.  ! TVD scheme

```

```

ln_traadv_muscl = .false.      ! MUSCL scheme
ln_traadv_muscl2 = .false.     ! MUSCL2 scheme + cen2 at boundaries
ln_traadv_ubs   = .false.     ! UBS scheme
ln_traadv_qck   = .false.     ! QUICKEST scheme
/

!-----
---
&namtra_ldf      ! lateral diffusion scheme for tracers

!-----
---
!                               ! Operator type:

ln_traldf_lap    = .true.      ! laplacian operator
ln_traldf_bilap = .false.     ! bilaplacian operator
!                               ! Direction of action:

ln_traldf_level = .false.     ! iso-level
ln_traldf_hor   = .false.     ! horizontal (geopotential) (needs
"key_ldfslp" when ln_sco=T)
ln_traldf_iso   = .true.      ! iso-neutral (needs
"key_ldfslp")
!                               ! Griffies parameters (all need
"key_ldfslp")

ln_traldf_grif  = .false.     ! use griffies triads
ln_traldf_gdia  = .false.     ! output griffies eddy velocities
ln_triad_iso    = .false.     ! pure lateral mixing in ML
ln_botmix_grif  = .false.     ! lateral mixing on bottom
!                               ! Coefficients

! Eddy-induced (GM) advection always used with Griffies; otherwise needs
"key_traldf_eiv"

! Value rn_aeiv_0 is ignored unless = 0 with Held-Larichev spatially
varying aeiv
!                               (key_traldf_c2d & key_traldf_eiv &
key_orca_r2, _r1 or _r05)

rn_aeiv_0       = 0.          ! eddy induced velocity coefficient [m2/s]
rn_aht_0        = 300.       ! horizontal eddy diffusivity for tracers [m2/s]
rn_ahtb_0       = 0.          ! background eddy diffusivity for ldf_iso [m2/s]
!                               (normally=0; not used with
Griffies)
/

!-----
&namtra_dmp      ! tracer: T & S newtonian damping
('key_tradmp')

!-----
ln_tradmp        = .false.    !
nn_hdmp          = -1         ! horizontal shape =-1, damping in Med and Red Seas only
!                               =XX, damping poleward of XX degrees (XX>0)

```





```

/

!-----
!namdyn_spg      !   surface pressure gradient   (CPP key only)
!-----
!
!                   !   explicit free surface
("key_dynspg_exp")
!                   !   filtered free surface
("key_dynspgflt")
!                   !   split-explicit free surface
("key_dynspg_ts")
!-----
&namdyn_ldf      !   lateral diffusion on momentum

!-----
!                                     !   Type of the operator :

ln_dynldf_lap    = .false.      !   laplacian operator
ln_dynldf_bilap = .true.       !   bilaplacian operator
!                                     !   Direction of action :

ln_dynldf_level = .false.      !   iso-level
ln_dynldf_hor   = .true.       !   horizontal (geopotential)           (require
"key_ldfslp" in s-coord.)
ln_dynldf_iso   = .false.      !   iso-neutral                           (require
"key_ldfslp")
!                                     !   Coefficient

rn_ahm_0_lap    = 40000.       !   horizontal laplacian eddy viscosity [m2/s]
rn_ahmb_0       = 0.           !   background eddy viscosity for ldf_iso [m2/s]
rn_ahm_0_blp    = -1.5e11      !   horizontal bilaplacian eddy viscosity [m4/s]
/

!!=====
!!          Tracers & Dynamics vertical physics namelists
!!=====
!!          namzdf          vertical physics
!!          namzdf_ric      richardson number dependent vertical mixing
("key_zdfric"          )
!!          namzdf_tke      TKE dependent vertical mixing
("key_zdftke"         )
!!          namzdf_kpp      KPP dependent vertical mixing
("key_zdfkpp"         )
!!          namzdf_ddm      double diffusive mixing parameterization
("key_zdfddm"         )
!!          namzdf_tmx      tidal mixing parameterization
("key_zdftmx"         )
!!=====
!-----
&namzdf          !   vertical physics

!-----
rn_avm0          = 1.2e-4      !   vertical eddy viscosity [m2/s]
(background Kz if not "key_zdfcst")

```

```

rn_avt0      = 1.2e-5      ! vertical eddy diffusivity [m2/s]
(background Kz if not "key_zdfcst")
nn_avb      = 0          ! profile for background avt & avm (=1) or not (=0)
nn_havtb    = 1          ! horizontal shape for avtb (=1) or not (=0)
ln_zdfevd   = .true.     ! enhanced vertical diffusion (evd) (T) or not (F)
nn_evdm     = 1          ! evd apply on tracer (=0) or on tracer and momentum
(=1)
rn_avevd    = 10.        ! evd mixing coefficient [m2/s]
ln_zdfnpc   = .false.    ! Non-Penetrative algorithm (T) or not (F)
nn_npc      = 1          ! frequency of application of npc
nn_npcp     = 365        ! npc control print frequency
ln_zdfexp   = .false.    ! time-stepping: split-explicit (T) or implicit (F)
time stepping
nn_zdfexp   = 3          ! number of sub-timestep for ln_zdfexp=T
/

!-----
&namzdf_ric ! richardson number dependent vertical diffusion
("key_zdfric" )

!-----
rn_avmri    = 100.e-4     ! maximum value of the vertical viscosity
rn_alp      = 5.          ! coefficient of the parameterization
nn_ric      = 2           ! coefficient of the parameterization
/

!-----
&namzdf_tke ! turbulent eddy kinetic dependent vertical diffusion
("key_zdf_tke" )

!-----
rn_ediff    = 0.1        ! coef. for vertical eddy coef.
(avt=rn_ediff*mxl*sqrt(e) )
rn_ediss    = 0.7        ! coef. of the Kolmogoroff dissipation
rn_ebb      = 67.83      ! coef. of the surface input of tke (=67.83 suggested
when ln_mxl0=T)
rn_emin     = 1.e-6      ! minimum value of tke [m2/s2]
rn_emin0    = 1.e-4      ! surface minimum value of tke [m2/s2]
nn_mxl      = 3          ! mixing length: = 0 bounded by the distance to surface
and bottom
!
!          = 1 bounded by the local vertical scale factor
!          = 2 first vertical derivative of mixing length bounded by
1
!          = 3 as =2 with distinct dissipative an mixing length
scale
nn_pdl      = 1          ! Prandtl number function of richarson number (=1,
avt=pdl(Ri)*avm) or not (=0, avt=avm)
ln_mxl0     = .true.     ! surface mixing length scale = F(wind stress) (T) or
not (F)
rn_mxl0     = 0.04       ! surface buoyancy lenght scale minimum value
ln_lc       = .true.     ! Langmuir cell parameterisation (Axell 2002)
rn_lc       = 0.15       ! coef. associated to Langmuir cells
nn_etau     = 1          ! penetration of tke below the mixed layer (ML) due to
internal & intertial waves
!          = 0 no penetration

```

```

!           = 1 add a tke source below the ML
!           = 2 add a tke source just at the base of the ML
!           = 3 as = 1 applied on HF part of the stress ("key_coupled")
rn_efr      = 0.05      ! fraction of surface tke value which penetrates below
the ML (nn_etau=1 or 2)
nn_etau     = 0        ! type of exponential decrease of tke penetration below
the ML
!           = 0 constant 10 m length scale
!           = 1 0.5m at the equator to 30m poleward of 40 degrees
/

```

```

!-----
&namzdf_kpp ! K-Profile Parameterization dependent vertical mixing
("key_zdfkpp", and optionnally:

```

```

!-----
"key_kppcustom" or "key_kpplktb")
ln_kpprimix = .true.      ! shear instability mixing
rn_difmiw   = 1.0e-04     ! constant internal wave viscosity [m2/s]
rn_difsiw   = 0.1e-04     ! constant internal wave diffusivity [m2/s]
rn_riinfy   = 0.8        ! local Richardson Number limit for shear instability
rn_difri    = 0.0050     ! maximum shear mixing at Rig = 0 [m2/s]
rn_bvsqcon  = -0.01e-07   ! Brunt-Vaisala squared for maximum convection
[1/s2]
rn_difcon   = 1.         ! maximum mixing in interior convection [m2/s]
nn_avb      = 0         ! horizontal averaged (=1) or not (=0) on avt and amv
nn_ave      = 1         ! constant (=0) or profile (=1) background on avt
/

```

```

!-----
&namzdf_gls ! GLS vertical diffusion
("key_zdfgls")

```

```

!-----
rn_emin     = 1.e-6      ! minimum value of e [m2/s2]
rn_epsmin   = 1.e-12     ! minimum value of eps [m2/s3]
ln_length_lim = .true.   ! limit on the dissipation rate under stable
stratification (Galperin et al., 1988)
rn_clim_galp = 0.53     ! galperin limit
ln_crban    = .true.     ! Use Craig & Banner (1994) surface wave mixing
parametrisation
ln_sigpsi   = .true.     ! Activate or not Burchard 2001 mods on psi schmidt
number in the wb case
rn_crban    = 100.      ! Craig and Banner 1994 constant for wb tke flux
rn_charn    = 70000.    ! Charnock constant for wb induced roughness length
nn_tkebc_surf = 1      ! surface tke condition (0/1/2=Dir/Neum/Dir Mellor-
Blumberg)
nn_tkebc_bot = 1       ! bottom tke condition (0/1=Dir/Neum)
nn_psibc_surf = 1     ! surface psi condition (0/1/2=Dir/Neum/Dir Mellor-
Blumberg)
nn_psibc_bot = 1      ! bottom psi condition (0/1=Dir/Neum)
nn_stab_func = 2       ! stability function (0=Galp, 1= KC94, 2=CanutoA,
3=CanutoB)
nn_clos     = 1        ! predefined closure type (0=MY82, 1=k-eps, 2=k-w,
3=Gen)

```

```

/

!-----
&namzdf_ddm      !   double diffusive mixing parameterization
("key_zdfddm")

!-----
rn_avts          = 1.e-4      !   maximum avs (vertical mixing on salinity)
rn_hsbfr         = 1.6       !   heat/salt buoyancy flux ratio
/

!-----
&namzdf_tmx      !   tidal mixing parameterization
("key_zdftmx")

!-----
rn_htmx          = 500.      !   vertical decay scale for turbulence (meters)
rn_n2min         = 1.e-8     !   threshold of the Brunt-Vaisala frequency (s-1)
rn_tfe           = 0.333     !   tidal dissipation efficiency
rn_me            = 0.2       !   mixing efficiency
ln_tmx_itf       = .true.    !   ITF specific parameterisation
rn_tfe_itf       = 1.        !   ITF tidal dissipation efficiency
/

!!=====
!!                ***  Miscelaneous namelists  ***
!!=====
!!  nammpp          Massively Parallel Processing
("key_mpp_mpi")
!!  nammpp_dyndist  Massively Parallel domain decomposition
("key_agrif" && "key_mpp_dyndist")
!!  namctl          Control prints & Benchmark
!!  namsol          elliptic solver / island / free surface
!!=====
!-----
&namsol          !   elliptic solver / island / free surface

!-----
nn_solv          =          1   !   elliptic solver: =1 preconditioned conjugate
gradient (pcg)
!
!               =2 successive-over-relaxation (sor)
nn_sol_arp       =          0   !   absolute/relative (0/1) precision convergence test
rn_eps           = 1.e-6     !   absolute precision of the solver
nn_nmin          =          300 !   minimum of iterations for the SOR solver
nn_nmax          =          2000 !   maximum of iterations for the SOR solver
nn_nmod          =          10  !   frequency of test for the SOR solver
rn_resmax        = 1.e-20    !   absolute precision for the SOR solver
rn_sor           = 1.973     !   optimal coefficient for SOR solver (to be adjusted
with the domain)
/

!-----
&nammpp          !   Massively Parallel Processing
("key_mpp_mpi)

```

```

!-----
cn_mpi_send = 'I'      ! mpi send/recieve type  ='S', 'B', or 'I' for standard
send,
                        ! buffer blocking send or immediate non-blocking
sends, resp.

nn_buffer   =  0      ! size in bytes of exported buffer ('B' case), 0 no
exportation
ln_nnogather= .true.   ! activate code to avoid mpi_allgather use at the
northfold
jpnj       =  16     ! jpnj  number of processors following i (set
automatically if < 1)
jpnj       =  30     ! jpnj  number of processors following j (set
automatically if < 1)
jpnij      =  480    ! jpnij number of local domains (set automatically if <
1)
/

!-----
&namctl      ! Control prints & Benchmark

!-----
ln_ctl       = .false. ! trends control print (expensive
nn_print     =  0      ! level of print (0 no extra print)
nn_ictls    =  1      ! start i indice of control sum (use to compare mono
versus
nn_ictle    =  1      ! end   i indice of control sum           multi processor
runs
nn_jctls    =  1      ! start j indice of control                   over a
subdomain)
nn_jctle    =  1      ! end   j indice of control
nn_isplt    =  1      ! number of processors in i-direction
nn_jsplt    =  1      ! number of processors in j-direction
nn_bench    =  0      ! Bench mode (1/0): CAUTION use zero except for bench
!          (no physical validity of the results)

nn_timing   =  0      ! timing by routine activated (=1) creates timing.output
file, or not (=0)
/

!!=====
!!                               *** Diagnostics namelists ***
!!=====
!!  namtrd      dynamics and/or tracer trends
("key_trddyn","key_trdtra","key_trdml")
!!  namgap      level mean model-data gap
("key_diagap")
!!  namflo      float parameters
("key_float")
!!  namptr      Poleward Transport Diagnostics
!!=====
!
!-----
&namnc4      ! netcdf4 chunking and compression settings
("key_netcdf4")

```

```

!-----
nn_nchunks_i= 4      ! number of chunks in i-dimension
nn_nchunks_j= 4      ! number of chunks in j-dimension
nn_nchunks_k= 31     ! number of chunks in k-dimension
      ! setting nn_nchunks_k = jpk will give a chunk size of 1 in the vertical
which
      ! is optimal for postprocessing which works
exclusively with horizontal slabs

ln_nc4zip  = .true.   ! (T) use netcdf4 chunking and compression
      ! (F) ignore chunking information and produce
netcdf3-compatible files

/

!-----
&namtrd    ! diagnostics on dynamics and/or tracer trends
("key_trddyn" and/or "key_trdtra")

!          !          or mixed-layer trends or barotropic vorticity
('key_trdmld' or "key_trdvor")
!-----
nn_trd     = 600      ! time step frequency dynamics and tracers trends
nn_ctls    = 0        ! control surface type in mixed-layer trends (0,1 or
n<jpk)
rn_ucf     = 1.       ! unit conversion factor (=1 -> /seconds ; =86400. ->
/day)
cn_trdrst_in  = "restart_mld"      ! suffix of ocean restart name (input)
cn_trdrst_out  = "restart_mld"      ! suffix of ocean restart name (output)
ln_trdmld_restart = .false.        ! restart for ML diagnostics
ln_trdmld_instant = .false.        ! flag to diagnose trends of instantaneous
or mean ML T/S
/

!-----
&namflo    ! float parameters
("key_float")

!-----
ln_rstflo = .false.    ! float restart (T) or not (F)
nn_writefl= 75         ! frequency of writing in float output file
nn_stockfl= 5475       ! frequency of creation of the float restart file
ln_argo   = .false.    ! Argo type floats (stay at the surface each 10 days)
ln_flork4 = .false.    ! trajectories computed with a 4th order Runge-Kutta
(T)
      ! or computed with Blanke' scheme (F)

/

!-----
&namptr    ! Poleward Transport Diagnostic

!-----
ln_diaptr  = .false.    ! Poleward heat and salt transport (T) or not (F)

```

```

ln_diaznl = .false.      ! Add zonal means and meridional stream functions
ln_subbas = .false.      ! Atlantic/Pacific/Indian basins computation (T) or
not                          ! (orca configuration only, need input basins mask
file named "subbasins.nc"

ln_ptrcomp = .false.     ! Add decomposition : overturning
nn_fptr    = 1           ! Frequency of ptr computation [time step]
nn_fwri    = 300         ! Frequency of ptr outputs [time step]
/

!-----
&namhsb      ! Heat and salt budgets

!-----
ln_diahsb = .false.      ! check the heat and salt budgets (T) or not (F)
/

!-----
&nam_diaharm ! Harmonic analysis of tidal constituents ('key_diaharm')

!-----
nit000_han = 696961      ! First time step used for harmonic analysis
nitend_han = 700800      ! Last time step used for harmonic analysis
nstep_han  = 15          ! Time step frequency for harmonic analysis
tname(1)   = 'M2'        ! Name of tidal constituents
tname(2)   = 'K1'        !
/

!-----
&namdct      ! transports through sections

!-----
nn_dct       = 15        ! time step frequency for transports computing
nn_dctwri    = 15        ! time step frequency for transports writing
nn_secdebug  = 112       !      0 : no section to debug
                        !      -1 : debug all section
                        !      0 < n : debug section number n

/

!!=====
!!          *** Observation & Assimilation namelists ***
!!=====
!!  namobs      observation and model comparison
('key_diaobs')
!!  nam_asminc  assimilation increments
('key_asminc')
!!=====
!
!-----
&namobs      ! observation usage switch
('key_diaobs')

```

```

!-----
ln_t3d      = .false.    ! Logical switch for T profile observations
ln_s3d      = .false.    ! Logical switch for S profile observations
ln_ena      = .false.    ! Logical switch for ENACT insitu data set
!           ! ln_cor           Logical switch for
Coriolis insitu data set

ln_profb    = .false.    ! Logical switch for feedback insitu data set
ln_sla      = .false.    ! Logical switch for SLA observations
ln_sladt    = .false.    ! Logical switch for AVISO SLA data
ln_slafb    = .false.    ! Logical switch for feedback SLA data
!           ! ln_ssh           Logical switch for SSH
observations

ln_sst      = .false.    ! Logical switch for SST observations
!           ! ln_reysst        Logical switch for
Reynolds observations

!           ! ln_ghrsst        Logical switch for
GHRSSST observations

ln_sstfb    = .false.    ! Logical switch for feedback SST data
!           ! ln_sss           Logical switch for SSS
observations

!           ! ln_seaice        Logical switch for Sea
Ice observations

!           ! ln_vel3d         Logical switch for
velocity observations

!           ! ln_velavcur      Logical switch for
velocity daily av. cur.

!           ! ln_velhrcur     Logical switch for
velocity high freq. cur.

!           ! ln_velavadcp    Logical switch for
velocity daily av. ADCP

!           ! ln_velhradcp    Logical switch for
velocity high freq. ADCP

!           ! ln_velfb        Logical switch for
feedback velocity data

!           ! ln_grid_global   Global distribtion of
observations

!           ! ln_grid_search_lookup Logical switch for obs
grid search w/lookup table

!           ! grid_search_file  Grid search lookup file
header

```



```

file names                !      enactfiles                ENACT input observation
!
observation file name     !      coriofiles                Coriolis input
!
!                          ! profbfiles: Profile feedback input observation file
name
!
profbfiles = 'profiles_01.nc' !      !
time setting switch      !      ln_profb_enatim            Enact feedback input
!
observation file name     !      slafilesact              Active SLA input
!
observation file name     !      slafilespas              Passive SLA input
!
!                          ! slafbfiles: Feedback SLA input observation file
name
!
slafbfiles = 'sla_01.nc'   !      !
observation file name     !      sstfiles                  GHRSSST input
!
!                          ! sstfbfiles: Feedback SST input observation file
name
!
sstfbfiles = 'sst_01.nc' 'sst_02.nc' 'sst_03.nc' 'sst_04.nc' 'sst_05.nc' !
!      seaicefiles              Sea Ice input
observation file name
!
input file name          !      velavcurfiles            Vel. cur. daily av.
!
input file name          !      velhvcurfiles            Vel. cur. high freq.
!
input file name          !      velavadcpfiles          Vel. ADCP daily av.
!
input file name          !      velhvacpfiles            Vel. ADCP high freq.
!
observation file name     !      velfbfiles                Vel. feedback input
!
YYYYMMDD.HHMMSS         !      dobsini                  Initial date in window
!
YYYYMMDD.HHMMSS         !      dobsend                  Final date in window

```

```

interpolation method      !      n1dint      Type of vertical
interpolation method      !      n2dint      Type of horizontal
observations near land switch      !      ln_nea      Rejection of
nmsshc      = 0      ! MSSH correction scheme
                        !      mdtdcorr      MDT correction
correction      !      mdtdcutoff      MDT cutoff for computed
ln_altbias = .false.      ! Logical switch for alt bias
ln_ignmis = .true.      ! Logical switch for ignoring missing files
                        !      endailyavtypes      ENACT daily average types
ln_grid_global = .true.      !
ln_grid_search_lookup = .false.      !
/

!-----
&nam_asminc      !      assimilation increments
('key_asminc')

!-----
ln_bkgwri = .false.      ! Logical switch for writing out background state
ln_trjwri = .false.      ! Logical switch for writing out state trajectory
ln_trainc = .false.      ! Logical switch for applying tracer increments
ln_dyninc = .false.      ! Logical switch for applying velocity increments
ln_sshinc = .false.      ! Logical switch for applying SSH increments
ln_asmdin = .false.      ! Logical switch for Direct Initialization (DI)
ln_asmiau = .false.      ! Logical switch for Incremental Analysis Updating
(IAU)
nitbkg      = 0      ! Timestep of background in [0,nitend-nit000-1]
nitdin      = 0      ! Timestep of background for DI in [0,nitend-nit000-1]
nitiaustr = 1      ! Timestep of start of IAU interval in [0,nitend-nit000-1]
nitiaufin = 15      ! Timestep of end of IAU interval in [0,nitend-nit000-1]
niaufn      = 0      ! Type of IAU weighting function
nittrjfrq = 0      ! Frequency of trajectory output for 4D-VAR
ln_salfix = .false.      ! Logical switch for ensuring that the sa > salfixmin
salfixmin = -9999      ! Minimum salinity after applying the increments
/

!-----
&namsbc_wave      ! External fields from wave model

!-----
!      !      file name      ! frequency (hours)      ! variable      ! time interp.      !
clim      !      'yearly'      /      ! weights      ! rotation      !
!      !      !      !      (if <0 months)      !      name      !      (logical)      !
(T/F)      !      'monthly'      ! filename      ! pairing      !

```

```

sn_cdg      = 'cdg_wave' ,          1          , 'drag_coeff' , .true. ,
.false. , 'daily' , '' , '' !
!
cn_dir_cdg  = './'      ! root directory for the location of drag coefficient
files
/

!-----
&namdyn_nept ! Neptune effect (simplified: lateral and vertical diffusions
removed)

!-----
! Suggested lengthscale values are those of Eby & Holloway (1994) for a
coarse model

ln_neptsimp      = .false.      ! yes/no use simplified neptune
ln_smooth_neptvel = .false.      ! yes/no smooth zunep, zvneq
rn_tslse         = 1.2e4        ! value of lengthscale L at the equator
rn_tslsp         = 3.0e3        ! value of lengthscale L at the pole
! Specify whether to ramp down the Neptune velocity in shallow
! water, and if so the depth range controlling such ramping down

ln_neptramp      = .true.        ! ramp down Neptune velocity in shallow water
rn_htrmin        = 100.0        ! min. depth of transition range
rn_htrmax        = 200.0        ! max. depth of transition range
/

```

```
!=====
=
! CICE namelist
!=====
=
```

```
&setup_nml
  days_per_year = 365
  , use_leap_years = .false.
  , year_init = 1976
  , istep0 = 0
  , dt = 1350.0
  , npt = 5760
  , ndyn_dt = 1
  , runtype = 'continue'
  , ice_ic =
'/projects/nemo/users/sgalde/CICE025/iced_start_abwORCA025_jan365.vn3.bin'
  , restart = .true.
  , restart_dir = './'
  , restart_file = 'xhimoï.restart'
  , pointer_file = './ice.restart_file'
  , dumpfreq = 'd'
  , dumpfreq_n = 90
  , diagfreq = 320
  , diag_type = 'file'
  , diag_file = 'ice_diag.d'
  , print_global = .true.
  , print_points = .true.
  , latpnt(1) = 90.
  , lonpnt(1) = 0.
  , latpnt(2) = -65.
  , lonpnt(2) = -45.
  , debug = .false.
  , histfreq = 'd','x','x','x','x'
  , histfreq_n = 5, 1, 1, 1, 1
  , hist_avg = .true.
  , history_dir = './'
  , history_file = 'xhimoï.5d'
  , history_format = 'nc'
  , write_ic = .false.
  , incond_dir = './'
  , incond_file = 'xhimoï_ic'
/
```

```
&grid_nml
  grid_format = 'nc'
  , grid_type = 'tripole'
  , grid_file =
'/projects/hirescm/hadgem3/grids/seaice/ORCA025/CICE_grid_280809.nc'
  , kmt_file =
'/projects/nemo/users/sgalde/CICE025/CICE_ORCA025_drakkar_kmt.nc'
  , kcatbound = 1
/
```

```
&domain_nml
```

```
    nprocs           = 480
  , processor_shape  = 'square-pop'
  , distribution_type = 'cartesian'
  , distribution_wght = 'block'
  , ew_boundary_type = 'cyclic'
  , ns_boundary_type = 'tripoleT'
/
```

```
&tracer_nml
  tr_iage           = .false.
  , restart_age     = .false.
  , tr_lvl          = .false.
  , restart_lvl     = .false.
  , tr_pond_cesm    = .false.
  , restart_pond_cesm = .false.
  , tr_pond_lvl     = .false.
  , restart_pond_lvl = .false.
  , tr_aero         = .false.
  , restart_aero    = .false.
/
```

```
&ice_nml
  kitd              = 1
  , kdyn            = 1
  , ndte            = 120
  , kstrength       = 1
  , krdg_partic     = 1
  , krdg_redist     = 1
  , mu_rdg          = 4.0
  , advection       = 'remap'
  , heat_capacity   = .false.
  , conduct         = 'MU71'
  , shortwave       = 'default'
  , albedo_type     = 'default'
  , albicev         = 0.78
  , albicev         = 0.36
  , albsnowv        = 0.98
  , albsnowi        = 0.70
  , ahmax           = 0.5
  , R_ice           = 0.
  , R_pnd           = 0.
  , R_snw           = 1.5
  , hs0             = 0.03
  , hs1             = 0.03
  , dpscale         = 1.e-3
  , frzrnd          = 'cesm'
  , snowinfil       = .false.
  , rfracmin        = 0.15
  , rfracmax        = 0.85
  , pndaspect       = 0.8
  , atmbndy         = 'default'
  , fyear_init      = 1997
  , ycycle          = 1
  , atm_data_format = 'nc'
  , atm_data_type   = 'default'
```

```

, atm_data_dir      = 'unknown_atm_data_dir'
, calc_strair       = .true.
, calc_Tsfc         = .true.
, precip_units      = 'mks'
, Tfrzpt            = 'constant'
, ustar_min         = 0.005
, update_ocn_f      = .true.
, oceanmixed_ice    = .false.
, ocn_data_format   = 'nc'
, sss_data_type     = 'default'
, sst_data_type     = 'default'
, ocn_data_dir      = 'unknown_ocn_data_dir'
, oceanmixed_file   = 'unknown_oceanmixed_file'
, restore_sst       = .false.
, trestore          = 0
, restore_ice       = .false.
/

```

&icefields\_nml

```

  f_tmask           = .true.
, f_tarea          = .true.
, f_uarea          = .true.
, f_dxt            = .false.
, f_dyt            = .false.
, f_dxu            = .false.
, f_dyu            = .false.
, f_HTN            = .false.
, f_HTE            = .false.
, f_ANGLE          = .true.
, f_ANGLET        = .true.
, f_NCAT           = .true.
, f_VGRDi          = .false.
, f_VGRDs          = .false.
, f_bounds         = .true.
, f_hi             = 'd'
, f_hs             = 'd'
, f_Tsfc           = 'd'
, f_aice           = 'd'
, f_uvel           = 'd'
, f_vvel           = 'd'
, f_fswdn          = 'd'
, f_flwdn          = 'd'
, f_snow           = 'x'
, f_snow_ai        = 'd'
, f_rain           = 'x'
, f_rain_ai        = 'd'
, f_sst            = 'd'
, f_sss            = 'd'
, f_uocn           = 'd'
, f_vocn           = 'd'
, f_frzmlt         = 'd'
, f_fswfac         = 'x'
, f_fswabs         = 'x'
, f_fswabs_ai      = 'd'
, f_albsni         = 'd'

```

```
, f_alvdr      = 'x'
, f_alidr      = 'x'
, f_albice     = 'x'
, f_albsno     = 'x'
, f_albpnd     = 'x'
, f_coszen     = 'x'
, f_flat       = 'x'
, f_flat_ai    = 'd'
, f_fsens      = 'x'
, f_fsens_ai   = 'd'
, f_flwup      = 'x'
, f_flwup_ai   = 'd'
, f_evap       = 'x'
, f_evap_ai    = 'd'
, f_Tair       = 'd'
, f_Tref       = 'x'
, f_Qref       = 'x'
, f_congel     = 'd'
, f_frazil     = 'd'
, f_snoice     = 'd'
, f_meltt      = 'd'
, f_melts      = 'd'
, f_meltb      = 'd'
, f_meltl      = 'd'
, f_fresh      = 'x'
, f_fresh_ai   = 'd'
, f_fsalt      = 'x'
, f_fsalt_ai   = 'd'
, f_fhocn      = 'x'
, f_fhocn_ai   = 'd'
, f_fswthru    = 'x'
, f_fswthru_ai = 'd'
, f_fsurf_ai   = 'd'
, f_fcondtop_ai = 'd'
, f_fmeltt_ai  = 'd'
, f_strairx    = 'd'
, f_strairy    = 'd'
, f_strltlx    = 'd'
, f_strltly    = 'd'
, f_strcorx    = 'd'
, f_strcory    = 'd'
, f_strocnx    = 'd'
, f_strocny    = 'd'
, f_strintx    = 'd'
, f_strinty    = 'd'
, f_strength   = 'd'
, f_divu       = 'd'
, f_shear      = 'd'
, f_sig1       = 'd'
, f_sig2       = 'd'
, f_dvidtt     = 'd'
, f_dvidtd     = 'd'
, f_daidtt     = 'd'
, f_daidtd     = 'd'
, f_mlt_onset  = 'd'
```

```
, f_frz_onset      = 'd'  
, f_dardg1dt      = 'd'  
, f_dardg2dt      = 'd'  
, f_dvirdgdt      = 'd'  
, f_opening       = 'd'  
, f_hisnap        = 'x'  
, f_aisnap        = 'x'  
, f_trsig         = 'd'  
, f_icepresent    = 'd'  
, f_iage          = 'x'  
, f_alvl          = 'x'  
, f_vlvl          = 'x'  
, f_ardg          = 'x'  
, f_vrdg          = 'x'  
, f_faero_atm     = 'x'  
, f_faero_ocn     = 'x'  
, f_aero          = 'x'  
, f_aicen         = 'd'  
, f_vicen         = 'd'  
, f_Tinz          = 'x'  
, f_Tsnz          = 'x'  
, f_fsurfn_ai     = 'd'  
, f_fcondtopn_ai = 'd'  
, f_fmelttn_ai    = 'd'  
, f_flatn_ai      = 'd'  
, f_apondn        = 'x'  
, f_apond         = 'x'  
, f_hpond         = 'x'  
, f_ipond         = 'x'  
, f_apond_ai      = 'x'  
, f_hpond_ai      = 'x'  
, f_ipond_ai      = 'x'  
, f_apeff         = 'x'
```

/
